# Supplementary material for: Preparation and characterization of CrIII, MnII, FeII, CoIIand NiIIcomplexes of a hexaazadithiophenolate macrocycle
Source: Royal Society of Chemistry journal article supplement (doi:10.1039/b513717a), 2005-12-22
Supplement: b513717a.pdf [file b513717a.pdf]

## Preparation and Characterization of Cr<sup>III</sup>, Mn<sup>II</sup>, Fe<sup>II</sup>, Co<sup>II</sup> and Ni<sup>II</sup> complexes of a hexaaza-dithiophenolate macrocycle

### SUPPORTING INFORMATION

Yves Journaux,<sup>[c]</sup> Thorsten Glaser,<sup>[b]</sup> Gunther Steinfeld,<sup>[a]</sup> Vasile Lozan,<sup>[a]</sup> and Berthold Kersting\*<sup>[a]</sup>

[a] Prof. Dr. B. Kersting, Dr. V. Lozan, Dr. G. Steinfeld  
Institut für Anorganische Chemie, Universität Leipzig, Johannisallee 29, D-04103  
Leipzig (Germany)  
Fax: +49/(0)341-97-36199  
E-Mail: b.kersting@uni-leipzig.de

[b] Prof. Dr. T. Glaser, Fakultät für Chemie der Universität Bielefeld, Lehrstuhl für  
Anorganische Chemie 1, Universitätsstr. 25, 33615 Bielefeld (Germany)

[c] Dr. Y. Journaux  
Laboratoire de Chimie Inorganique, CNRS-Université Paris-Sud  
Bat 420, 91405 Orsay, France

#### CONTENT:

1. Magnetic susceptibility data of [(L<sup>Me</sup>)Mn<sup>II</sup><sub>2</sub>(μ-OAc)]BPh<sub>4</sub> (**2**·BPh<sub>4</sub>) as a function of the temperature.
2. Magnetic susceptibility data of [(L<sup>Me</sup>)Fe<sup>II</sup><sub>2</sub>(μ-OAc)]BPh<sub>4</sub> (**3**·BPh<sub>4</sub>) as a function of the temperature.
3. Magnetic susceptibility data of [(L<sup>Me</sup>)Co<sup>II</sup><sub>2</sub>(μ-OAc)]BPh<sub>4</sub> (**4**·BPh<sub>4</sub>) as a function of the temperature.
4. Magnetic susceptibility data of [(L<sup>Me</sup>)Ni<sup>II</sup><sub>2</sub>(μ-OAc)]BPh<sub>4</sub> (**5**·BPh<sub>4</sub>) as a function of the

temperature.

1) Magnetic susceptibility data of  $[(L^{M_c})Mn^{II}_2(\mu-OAc)]BPh_4$  (**2**· $BPh_4$ ) as a function of the temperature. Sample = 0.02306 [g];  $M_r = 1157.23$  [g mol<sup>-1</sup>], diamagnetic correction = -0.005491 [cm<sup>3</sup>/mol],  $H = 0.1$  Tesla

| $T / K$ | $\chi_{M,exp} / cm^3 mol^{-1}$ | $\chi_{M,calcd} / cm^3 mol^{-1}$ | $(\chi_{M,exp} - \chi_{M,calcd.})$ |
|---------|--------------------------------|----------------------------------|------------------------------------|
| 299.990 | 0.02348                        | 0.02379                          | -3.080E-4                          |
| 295.200 | 0.02415                        | 0.02411                          | 3.400E-5                           |
| 289.340 | 0.02449                        | 0.02452                          | -3.000E-5                          |
| 284.420 | 0.02489                        | 0.02487                          | 1.900E-5                           |
| 279.430 | 0.02526                        | 0.02524                          | 2.700E-5                           |
| 274.410 | 0.02566                        | 0.02561                          | 3.900E-5                           |
| 269.420 | 0.02604                        | 0.02600                          | 3.400E-5                           |
| 264.440 | 0.02646                        | 0.02640                          | 6.100E-5                           |
| 259.430 | 0.02687                        | 0.02682                          | 5.100E-5                           |
| 254.440 | 0.02729                        | 0.02724                          | 4.900E-5                           |
| 249.440 | 0.02786                        | 0.02768                          | 1.800E-4                           |
| 244.450 | 0.02837                        | 0.02813                          | 2.390E-4                           |
| 239.450 | 0.02884                        | 0.02859                          | 2.480E-4                           |
| 234.490 | 0.02934                        | 0.02907                          | 2.720E-4                           |
| 229.470 | 0.02988                        | 0.02957                          | 3.120E-4                           |
| 224.480 | 0.03032                        | 0.03008                          | 2.370E-4                           |
| 219.480 | 0.03078                        | 0.03061                          | 1.760E-4                           |
| 214.490 | 0.03125                        | 0.03115                          | 1.020E-4                           |
| 209.500 | 0.03190                        | 0.03172                          | 1.810E-4                           |
| 204.510 | 0.03252                        | 0.03230                          | 2.190E-4                           |
| 199.510 | 0.03312                        | 0.03290                          | 2.200E-4                           |
| 194.510 | 0.03378                        | 0.03353                          | 2.490E-4                           |
| 189.540 | 0.03447                        | 0.03417                          | 2.980E-4                           |
| 184.530 | 0.03507                        | 0.03484                          | 2.280E-4                           |
| 179.560 | 0.03583                        | 0.03553                          | 2.960E-4                           |
| 174.570 | 0.03656                        | 0.03625                          | 3.140E-4                           |
| 169.560 | 0.03728                        | 0.03700                          | 2.870E-4                           |
| 164.580 | 0.03810                        | 0.03776                          | 3.390E-4                           |
| 159.580 | 0.03885                        | 0.03856                          | 2.890E-4                           |
| 154.600 | 0.03967                        | 0.03939                          | 2.790E-4                           |
| 149.600 | 0.04057                        | 0.04025                          | 3.250E-4                           |
| 144.620 | 0.04137                        | 0.04113                          | 2.430E-4                           |
| 139.620 | 0.04237                        | 0.04205                          | 3.220E-4                           |
| 134.640 | 0.04336                        | 0.04300                          | 3.590E-4                           |
| 129.650 | 0.04427                        | 0.04398                          | 2.880E-4                           |
| 124.660 | 0.04527                        | 0.04499                          | 2.770E-4                           |
| 119.670 | 0.04623                        | 0.04604                          | 1.870E-4                           |
| 114.700 | 0.04741                        | 0.04711                          | 2.950E-4                           |

|         |         |         |           |
|---------|---------|---------|-----------|
| 109.750 | 0.04836 | 0.04821 | 1.530E-4  |
| 104.790 | 0.04948 | 0.04933 | 1.420E-4  |
| 99.860  | 0.05071 | 0.05047 | 2.360E-4  |
| 97.820  | 0.05099 | 0.05095 | 4.100E-5  |
| 95.740  | 0.05134 | 0.05144 | -1.010E-4 |
| 93.740  | 0.05199 | 0.05191 | 7.600E-5  |
| 91.750  | 0.05233 | 0.05238 | -4.800E-5 |
| 89.770  | 0.05289 | 0.05285 | 4.100E-5  |
| 87.800  | 0.05332 | 0.05332 | 2.000E-6  |
| 85.800  | 0.05358 | 0.05379 | -2.060E-4 |
| 83.820  | 0.05416 | 0.05425 | -9.000E-5 |
| 81.850  | 0.05464 | 0.05472 | -7.700E-5 |
| 79.870  | 0.05506 | 0.05518 | -1.180E-4 |
| 78.070  | 0.05526 | 0.05559 | -3.250E-4 |
| 76.070  | 0.05581 | 0.05604 | -2.330E-4 |
| 74.070  | 0.05626 | 0.05649 | -2.300E-4 |
| 72.070  | 0.05655 | 0.05693 | -3.780E-4 |
| 70.070  | 0.05724 | 0.05735 | -1.130E-4 |
| 68.090  | 0.05738 | 0.05776 | -3.800E-4 |
| 66.090  | 0.05797 | 0.05816 | -1.880E-4 |
| 64.060  | 0.05809 | 0.05855 | -4.650E-4 |
| 62.100  | 0.05870 | 0.05891 | -2.120E-4 |
| 60.090  | 0.05889 | 0.05926 | -3.640E-4 |
| 58.100  | 0.05926 | 0.05958 | -3.220E-4 |
| 56.090  | 0.05957 | 0.05987 | -3.090E-4 |
| 54.090  | 0.05975 | 0.06014 | -3.870E-4 |
| 52.080  | 0.06008 | 0.06038 | -2.980E-4 |
| 50.070  | 0.06018 | 0.06058 | -4.000E-4 |
| 48.040  | 0.06068 | 0.06075 | -6.700E-5 |
| 46.030  | 0.06085 | 0.06088 | -2.300E-5 |
| 44.020  | 0.06103 | 0.06096 | 6.700E-5  |
| 42.020  | 0.06131 | 0.06100 | 3.080E-4  |
| 40.010  | 0.06105 | 0.06100 | 4.800E-5  |
| 38.010  | 0.06085 | 0.06095 | -1.020E-4 |
| 36.000  | 0.06068 | 0.06084 | -1.600E-4 |
| 34.000  | 0.06044 | 0.06069 | -2.540E-4 |
| 32.000  | 0.06011 | 0.06048 | -3.720E-4 |
| 30.000  | 0.05985 | 0.06022 | -3.700E-4 |
| 27.990  | 0.05945 | 0.05989 | -4.380E-4 |
| 25.990  | 0.05901 | 0.05949 | -4.770E-4 |
| 23.990  | 0.05862 | 0.05901 | -3.990E-4 |
| 22.000  | 0.05797 | 0.05844 | -4.770E-4 |
| 20.000  | 0.05708 | 0.05775 | -6.740E-4 |
| 19.000  | 0.05679 | 0.05734 | -5.530E-4 |
| 18.000  | 0.05639 | 0.05689 | -5.000E-4 |
| 17.000  | 0.05567 | 0.05638 | -7.120E-4 |
| 16.000  | 0.05531 | 0.05580 | -4.970E-4 |
| 15.000  | 0.05454 | 0.05514 | -5.980E-4 |

|        |         |         |           |
|--------|---------|---------|-----------|
| 14.010 | 0.05370 | 0.05439 | -6.870E-4 |
| 13.000 | 0.05308 | 0.05349 | -4.140E-4 |
| 12.010 | 0.05189 | 0.05246 | -5.680E-4 |
| 10.970 | 0.05049 | 0.05114 | -6.520E-4 |
| 10.030 | 0.04920 | 0.04967 | -4.780E-4 |
| 9.020  | 0.04719 | 0.04770 | -5.070E-4 |
| 8.010  | 0.04467 | 0.04510 | -4.320E-4 |
| 7.000  | 0.04149 | 0.04157 | -7.600E-5 |
| 6.000  | 0.03682 | 0.03666 | 1.600E-4  |
| 5.000  | 0.03024 | 0.02977 | 4.680E-4  |
| 4.000  | 0.02125 | 0.02083 | 4.150E-4  |
| 3.000  | 0.01252 | 0.01180 | 7.180E-4  |
| 2.010  | 0.00758 | 0.00777 | -1.900E-4 |

2) Magnetic susceptibility data of  $[(L^{Me})Fe_2(\mu-OAc)]BPh_4$  (**3**· $BPh_4$ ) as a function of the temperature. Sample = 0.02273 [g];  $M_r$  = 1159.05 [g/mol], diamagnetic correction = - 0.0055000 [cm<sup>3</sup>/mol],  $H$  = 0.2 Tesla

| $T / K$ | $\chi_{M,exp} / \text{cm}^3 \text{mol}^{-1}$ | $\chi_{M,calcd.} / \text{cm}^3 \text{mol}^{-1}$ | $(\chi_{M,exp} - \chi_{M,calcd.})$ |
|---------|----------------------------------------------|-------------------------------------------------|------------------------------------|
| 299.990 | 0.01725                                      | 0.01741                                         | -1.600E-4                          |
| 295.200 | 0.01769                                      | 0.01762                                         | 7.500E-5                           |
| 289.340 | 0.01795                                      | 0.01789                                         | 6.200E-5                           |
| 284.410 | 0.01817                                      | 0.01811                                         | 5.600E-5                           |
| 279.400 | 0.01843                                      | 0.01835                                         | 8.000E-5                           |
| 274.380 | 0.01868                                      | 0.01860                                         | 8.000E-5                           |
| 269.410 | 0.01907                                      | 0.01885                                         | 2.200E-4                           |
| 264.420 | 0.01932                                      | 0.01910                                         | 2.210E-4                           |
| 259.430 | 0.01962                                      | 0.01937                                         | 2.550E-4                           |
| 254.420 | 0.01990                                      | 0.01964                                         | 2.610E-4                           |
| 249.410 | 0.02015                                      | 0.01991                                         | 2.420E-4                           |
| 244.420 | 0.02041                                      | 0.02019                                         | 2.170E-4                           |
| 239.460 | 0.02071                                      | 0.02048                                         | 2.290E-4                           |
| 234.470 | 0.02097                                      | 0.02078                                         | 1.880E-4                           |
| 229.470 | 0.02125                                      | 0.02108                                         | 1.740E-4                           |
| 224.470 | 0.02155                                      | 0.02139                                         | 1.590E-4                           |
| 219.460 | 0.02187                                      | 0.02171                                         | 1.630E-4                           |
| 214.480 | 0.02217                                      | 0.02204                                         | 1.350E-4                           |
| 209.480 | 0.02248                                      | 0.02237                                         | 1.120E-4                           |
| 204.490 | 0.02281                                      | 0.02271                                         | 9.600E-5                           |
| 199.510 | 0.02316                                      | 0.02306                                         | 9.900E-5                           |
| 194.500 | 0.02349                                      | 0.02342                                         | 7.000E-5                           |
| 189.510 | 0.02386                                      | 0.02379                                         | 7.500E-5                           |
| 184.520 | 0.02418                                      | 0.02416                                         | 2.100E-5                           |
| 179.520 | 0.02456                                      | 0.02455                                         | 1.300E-5                           |
| 174.550 | 0.02494                                      | 0.02493                                         | 2.000E-6                           |
| 169.550 | 0.02534                                      | 0.02533                                         | 2.000E-6                           |

|         |         |         |           |
|---------|---------|---------|-----------|
| 164.570 | 0.02573 | 0.02574 | -1.300E-5 |
| 159.580 | 0.02612 | 0.02615 | -2.800E-5 |
| 154.580 | 0.02655 | 0.02657 | -2.300E-5 |
| 149.600 | 0.02698 | 0.02700 | -1.900E-5 |
| 144.610 | 0.02737 | 0.02743 | -6.000E-5 |
| 139.600 | 0.02780 | 0.02786 | -6.500E-5 |
| 134.610 | 0.02823 | 0.02830 | -7.100E-5 |
| 129.640 | 0.02866 | 0.02873 | -7.500E-5 |
| 124.660 | 0.02904 | 0.02917 | -1.320E-4 |
| 119.680 | 0.02949 | 0.02960 | -1.100E-4 |
| 114.690 | 0.02989 | 0.03002 | -1.310E-4 |
| 109.750 | 0.03031 | 0.03044 | -1.280E-4 |
| 104.820 | 0.03071 | 0.03083 | -1.220E-4 |
| 99.890  | 0.03108 | 0.03121 | -1.360E-4 |
| 97.800  | 0.03118 | 0.03137 | -1.880E-4 |
| 95.730  | 0.03130 | 0.03151 | -2.090E-4 |
| 93.740  | 0.03147 | 0.03165 | -1.820E-4 |
| 91.750  | 0.03162 | 0.03179 | -1.660E-4 |
| 89.760  | 0.03172 | 0.03191 | -1.900E-4 |
| 87.780  | 0.03183 | 0.03204 | -2.080E-4 |
| 85.790  | 0.03195 | 0.03215 | -1.960E-4 |
| 83.800  | 0.03211 | 0.03226 | -1.520E-4 |
| 81.820  | 0.03221 | 0.03236 | -1.540E-4 |
| 79.860  | 0.03223 | 0.03246 | -2.250E-4 |
| 78.060  | 0.03228 | 0.03254 | -2.510E-4 |
| 76.060  | 0.03240 | 0.03261 | -2.160E-4 |
| 74.070  | 0.03245 | 0.03269 | -2.380E-4 |
| 72.070  | 0.03252 | 0.03275 | -2.230E-4 |
| 70.090  | 0.03259 | 0.03280 | -2.090E-4 |
| 68.070  | 0.03261 | 0.03284 | -2.310E-4 |
| 66.100  | 0.03265 | 0.03287 | -2.250E-4 |
| 64.080  | 0.03267 | 0.03289 | -2.190E-4 |
| 62.090  | 0.03270 | 0.03290 | -2.030E-4 |
| 60.090  | 0.03266 | 0.03290 | -2.340E-4 |
| 58.090  | 0.03266 | 0.03288 | -2.260E-4 |
| 56.100  | 0.03265 | 0.03285 | -2.050E-4 |
| 54.090  | 0.03259 | 0.03281 | -2.240E-4 |
| 52.080  | 0.03261 | 0.03275 | -1.430E-4 |
| 50.070  | 0.03250 | 0.03268 | -1.820E-4 |
| 48.030  | 0.03246 | 0.03260 | -1.400E-4 |
| 46.030  | 0.03232 | 0.03250 | -1.810E-4 |
| 44.030  | 0.03221 | 0.03238 | -1.690E-4 |
| 42.020  | 0.03209 | 0.03225 | -1.560E-4 |
| 40.010  | 0.03194 | 0.03210 | -1.560E-4 |
| 38.010  | 0.03177 | 0.03193 | -1.560E-4 |
| 36.000  | 0.03155 | 0.03173 | -1.840E-4 |
| 34.000  | 0.03133 | 0.03151 | -1.770E-4 |
| 32.000  | 0.03106 | 0.03126 | -2.000E-4 |

|        |         |         |           |
|--------|---------|---------|-----------|
| 30.000 | 0.03077 | 0.03097 | -2.020E-4 |
| 27.990 | 0.03045 | 0.03063 | -1.750E-4 |
| 25.990 | 0.03011 | 0.03023 | -1.250E-4 |
| 23.990 | 0.02964 | 0.02976 | -1.260E-4 |
| 21.990 | 0.02912 | 0.02919 | -7.100E-5 |
| 20.000 | 0.02851 | 0.02848 | 3.100E-5  |
| 19.000 | 0.02806 | 0.02806 | 9.000E-6  |
| 18.000 | 0.02765 | 0.02757 | 7.900E-5  |
| 17.000 | 0.02717 | 0.02701 | 1.560E-4  |
| 16.000 | 0.02658 | 0.02636 | 2.220E-4  |
| 15.000 | 0.02591 | 0.02559 | 3.180E-4  |
| 14.010 | 0.02513 | 0.02470 | 4.250E-4  |
| 13.010 | 0.02417 | 0.02364 | 5.370E-4  |
| 12.010 | 0.02305 | 0.02238 | 6.670E-4  |
| 10.980 | 0.02144 | 0.02086 | 5.800E-4  |
| 10.030 | 0.01982 | 0.01927 | 5.530E-4  |
| 9.020  | 0.01784 | 0.01741 | 4.300E-4  |
| 8.010  | 0.01556 | 0.01552 | 4.000E-5  |
| 7.000  | 0.01312 | 0.01385 | -7.280E-4 |
| 6.000  | 0.01072 |         |           |
| 5.010  | 0.00866 |         |           |
| 4.000  | 0.00745 |         |           |
| 3.000  | 0.00753 |         |           |
| 2.000  | 0.00850 |         |           |

3) Magnetic susceptibility data of  $[(L^{Me})Co_2(\mu-OAc)]BPh_4$  ( $4 \cdot BPh_4$ ) as a function of the temperature. Sample = 0.03051 [g];  $M_r = 1165.22$  [g/mol], diamagnetic correction =  $-0.0055309$  [ $cm^3/mol$ ],  $H = 0.2$  Tesla

| $T / K$ | $\chi_{M,exp.} / cm^3 mol^{-1}$ | $\chi_{M,calcd.} / cm^3 mol^{-1}$ | $(\chi_{M,exp.} - \chi_{M,calcd.})$ |
|---------|---------------------------------|-----------------------------------|-------------------------------------|
| 2.000   | 0.30715                         | 0.30347                           | 3.680E-3                            |
| 3.000   | 0.26316                         | 0.21402                           | 4.914E-2                            |
| 4.000   | 0.22882                         | 0.17925                           | 4.957E-2                            |
| 5.000   | 0.20912                         | 0.16827                           | 4.085E-2                            |
| 6.000   | 0.19711                         | 0.16724                           | 2.987E-2                            |
| 7.000   | 0.18749                         | 0.16928                           | 1.821E-2                            |
| 8.010   | 0.18131                         | 0.17135                           | 9.960E-3                            |
| 9.020   | 0.17773                         | 0.17231                           | 5.420E-3                            |
| 10.030  | 0.17372                         | 0.17199                           | 1.730E-3                            |
| 10.970  | 0.17035                         | 0.17069                           | -3.400E-4                           |
| 12.000  | 0.16623                         | 0.16840                           | -2.170E-3                           |
| 13.000  | 0.16327                         | 0.16557                           | -2.300E-3                           |
| 14.010  | 0.15995                         | 0.16230                           | -2.350E-3                           |
| 15.000  | 0.15659                         | 0.15887                           | -2.280E-3                           |
| 16.000  | 0.15286                         | 0.15528                           | -2.420E-3                           |
| 17.000  | 0.14929                         | 0.15165                           | -2.360E-3                           |

|         |         |         |           |
|---------|---------|---------|-----------|
| 18.000  | 0.14447 | 0.14804 | -3.570E-3 |
| 19.000  | 0.14213 | 0.14449 | -2.360E-3 |
| 20.000  | 0.13966 | 0.14104 | -1.380E-3 |
| 22.000  | 0.13263 | 0.13446 | -1.830E-3 |
| 23.990  | 0.12594 | 0.12839 | -2.450E-3 |
| 25.990  | 0.12178 | 0.12279 | -1.010E-3 |
| 27.990  | 0.11745 | 0.11765 | -2.000E-4 |
| 29.990  | 0.11276 | 0.11295 | -1.900E-4 |
| 32.000  | 0.10838 | 0.10862 | -2.400E-4 |
| 34.000  | 0.10455 | 0.10467 | -1.200E-4 |
| 36.000  | 0.10087 | 0.10103 | -1.600E-4 |
| 38.010  | 0.09733 | 0.09765 | -3.200E-4 |
| 40.010  | 0.09426 | 0.09454 | -2.800E-4 |
| 42.020  | 0.09154 | 0.09163 | -9.000E-5 |
| 44.020  | 0.08897 | 0.08894 | 3.000E-5  |
| 46.030  | 0.08635 | 0.08641 | -6.000E-5 |
| 48.040  | 0.08395 | 0.08404 | -9.000E-5 |
| 50.060  | 0.08151 | 0.08181 | -3.000E-4 |
| 52.080  | 0.07941 | 0.07970 | -2.900E-4 |
| 54.090  | 0.07741 | 0.07772 | -3.100E-4 |
| 56.080  | 0.07560 | 0.07587 | -2.700E-4 |
| 58.090  | 0.07396 | 0.07409 | -1.300E-4 |
| 60.080  | 0.07217 | 0.07241 | -2.400E-4 |
| 62.080  | 0.07046 | 0.07081 | -3.500E-4 |
| 64.100  | 0.06877 | 0.06927 | -5.000E-4 |
| 66.060  | 0.06712 | 0.06783 | -7.100E-4 |
| 68.080  | 0.06614 | 0.06642 | -2.800E-4 |
| 70.070  | 0.06471 | 0.06508 | -3.700E-4 |
| 72.070  | 0.06354 | 0.06379 | -2.500E-4 |
| 74.060  | 0.06195 | 0.06256 | -6.100E-4 |
| 76.060  | 0.06046 | 0.06137 | -9.100E-4 |
| 78.070  | 0.05972 | 0.06022 | -5.000E-4 |
| 79.880  | 0.05918 | 0.05922 | -4.000E-5 |
| 81.820  | 0.05821 | 0.05818 | 3.000E-5  |
| 83.800  | 0.05723 | 0.05716 | 7.000E-5  |
| 85.780  | 0.05598 | 0.05617 | -1.900E-4 |
| 87.780  | 0.05527 | 0.05520 | 7.000E-5  |
| 89.750  | 0.05435 | 0.05428 | 7.000E-5  |
| 91.750  | 0.05347 | 0.05338 | 9.000E-5  |
| 93.740  | 0.05239 | 0.05251 | -1.200E-4 |
| 95.730  | 0.05175 | 0.05166 | 9.000E-5  |
| 97.810  | 0.05067 | 0.05081 | -1.400E-4 |
| 99.840  | 0.05035 | 0.05000 | 3.500E-4  |
| 104.800 | 0.04848 | 0.04812 | 3.600E-4  |
| 109.740 | 0.04645 | 0.04638 | 7.000E-5  |
| 114.700 | 0.04518 | 0.04475 | 4.300E-4  |
| 119.660 | 0.04337 | 0.04322 | 1.500E-4  |
| 124.640 | 0.04220 | 0.04179 | 4.100E-4  |

|         |         |         |           |
|---------|---------|---------|-----------|
| 129.620 | 0.04088 | 0.04044 | 4.400E-4  |
| 134.600 | 0.03960 | 0.03918 | 4.200E-4  |
| 139.600 | 0.03838 | 0.03798 | 4.000E-4  |
| 144.580 | 0.03724 | 0.03685 | 3.900E-4  |
| 149.550 | 0.03593 | 0.03579 | 1.400E-4  |
| 154.610 | 0.03463 | 0.03477 | -1.400E-4 |
| 159.560 | 0.03432 | 0.03382 | 5.000E-4  |
| 164.550 | 0.03307 | 0.03292 | 1.500E-4  |
| 169.530 | 0.03225 | 0.03206 | 1.900E-4  |
| 174.530 | 0.03131 | 0.03124 | 7.000E-5  |
| 179.510 | 0.03065 | 0.03047 | 1.800E-4  |
| 184.520 | 0.03014 | 0.02972 | 4.200E-4  |
| 189.510 | 0.02925 | 0.02901 | 2.400E-4  |
| 194.480 | 0.02837 | 0.02834 | 3.000E-5  |
| 199.490 | 0.02763 | 0.02769 | -6.000E-5 |
| 204.470 | 0.02721 | 0.02708 | 1.300E-4  |
| 209.440 | 0.02683 | 0.02649 | 3.400E-4  |
| 214.460 | 0.02608 | 0.02592 | 1.600E-4  |
| 219.440 | 0.02541 | 0.02538 | 3.000E-5  |
| 224.450 | 0.02489 | 0.02485 | 4.000E-5  |
| 229.430 | 0.02441 | 0.02435 | 6.000E-5  |
| 234.430 | 0.02387 | 0.02387 | 0         |
| 239.380 | 0.02329 | 0.02341 | -1.200E-4 |
| 244.410 | 0.02284 | 0.02296 | -1.200E-4 |
| 249.380 | 0.02241 | 0.02254 | -1.300E-4 |
| 254.400 | 0.02200 | 0.02212 | -1.200E-4 |
| 259.360 | 0.02162 | 0.02172 | -1.000E-4 |
| 264.370 | 0.02123 | 0.02134 | -1.100E-4 |
| 269.380 | 0.02085 | 0.02096 | -1.100E-4 |
| 274.390 | 0.02049 | 0.02060 | -1.100E-4 |
| 279.370 | 0.02015 | 0.02025 | -1.000E-4 |
| 284.380 | 0.01980 | 0.01992 | -1.200E-4 |
| 289.600 | 0.01951 | 0.01958 | -7.000E-5 |
| 294.100 | 0.01922 | 0.01929 | -7.000E-5 |

4) Magnetic susceptibility data of  $[(L^{Me})Ni_2(\mu-OAc)]BPh_4$  (**5**·BPh<sub>4</sub>) as a function of the temperature. Sample = 0.02396 [g];  $M_r = 1164.74$  [g/mol], diamagnetic correction = -0.0055285 [cm<sup>3</sup>/mol],  $H = 0.2$  Tesla

| $T / K$ | $\chi_M T_{exp} / cm^3 K mol^{-1}$ | $\chi_M T_{calcd} / cm^3 K mol^{-1}$ | $\chi_M T_{exp} - \chi_M T_{calcd}$ |
|---------|------------------------------------|--------------------------------------|-------------------------------------|
| 299.990 | 4.50336                            | 4.53468                              | 3.132E-2                            |
| 294.160 | 4.50851                            | 4.53735                              | 2.884E-2                            |
| 289.450 | 4.51772                            | 4.53955                              | 2.183E-2                            |
| 284.420 | 4.51640                            | 4.54194                              | 2.554E-2                            |
| 279.410 | 4.51826                            | 4.54438                              | 2.612E-2                            |



|         |         |         |           |
|---------|---------|---------|-----------|
| 274.410 | 4.51861 | 4.54686 | 2.825E-2  |
| 269.380 | 4.53724 | 4.54940 | 1.216E-2  |
| 264.400 | 4.55264 | 4.55196 | -6.757E-4 |
| 259.390 | 4.55685 | 4.55458 | -2.267E-3 |
| 254.410 | 4.55852 | 4.55729 | -1.234E-3 |
| 249.440 | 4.56361 | 4.56001 | -3.597E-3 |
| 244.420 | 4.56343 | 4.56286 | -5.693E-4 |
| 239.440 | 4.56440 | 4.56572 | 1.319E-3  |
| 234.440 | 4.56623 | 4.56870 | 2.465E-3  |
| 229.430 | 4.56895 | 4.57175 | 2.803E-3  |
| 224.450 | 4.56194 | 4.57487 | 1.293E-2  |
| 219.450 | 4.56369 | 4.57810 | 1.441E-2  |
| 214.470 | 4.56799 | 4.58139 | 1.340E-2  |
| 209.470 | 4.56895 | 4.58478 | 1.583E-2  |
| 204.480 | 4.57420 | 4.58830 | 1.410E-2  |
| 199.490 | 4.57743 | 4.59193 | 1.450E-2  |
| 194.490 | 4.58459 | 4.59568 | 1.109E-2  |
| 189.500 | 4.59417 | 4.59954 | 5.366E-3  |
| 184.520 | 4.60044 | 4.60354 | 3.104E-3  |
| 179.530 | 4.60695 | 4.60770 | 7.539E-4  |
| 174.540 | 4.61120 | 4.61201 | 8.149E-4  |
| 169.530 | 4.61233 | 4.61650 | 4.166E-3  |
| 164.550 | 4.61701 | 4.62113 | 4.124E-3  |
| 159.570 | 4.61961 | 4.62599 | 6.385E-3  |
| 154.590 | 4.62194 | 4.63104 | 9.099E-3  |
| 149.570 | 4.62860 | 4.63636 | 7.757E-3  |
| 144.590 | 4.63663 | 4.64188 | 5.251E-3  |
| 139.600 | 4.64171 | 4.64768 | 5.971E-3  |
| 134.620 | 4.65359 | 4.65376 | 1.669E-4  |
| 129.640 | 4.64645 | 4.66014 | 1.369E-2  |
| 124.660 | 4.65462 | 4.66686 | 1.224E-2  |
| 119.690 | 4.66629 | 4.67395 | 7.664E-3  |
| 114.880 | 4.65977 | 4.68118 | 2.141E-2  |
| 109.850 | 4.69192 | 4.68920 | -2.718E-3 |
| 104.850 | 4.70018 | 4.69765 | -2.533E-3 |
| 99.880  | 4.71123 | 4.70659 | -4.644E-3 |
| 97.820  | 4.69618 | 4.71045 | 1.427E-2  |
| 95.730  | 4.70911 | 4.71450 | 5.386E-3  |
| 93.740  | 4.71344 | 4.71843 | 4.992E-3  |
| 91.760  | 4.72081 | 4.72247 | 1.657E-3  |
| 89.760  | 4.72657 | 4.72664 | 6.720E-5  |
| 87.780  | 4.73553 | 4.73089 | -4.641E-3 |
| 85.800  | 4.74523 | 4.73525 | -9.980E-3 |
| 83.820  | 4.75684 | 4.73973 | -1.711E-2 |
| 81.840  | 4.76021 | 4.74434 | -1.587E-2 |
| 79.860  | 4.76365 | 4.74907 | -1.458E-2 |
| 77.900  | 4.77379 | 4.75390 | -1.990E-2 |
| 75.920  | 4.78057 | 4.75891 | -2.166E-2 |

|        |         |         |           |
|--------|---------|---------|-----------|
| 74.060 | 4.76491 | 4.76373 | -1.178E-3 |
| 72.060 | 4.76910 | 4.76908 | -1.670E-5 |
| 70.080 | 4.78501 | 4.77452 | -1.049E-2 |
| 68.060 | 4.78425 | 4.78022 | -4.026E-3 |
| 66.080 | 4.80286 | 4.78599 | -1.688E-2 |
| 64.080 | 4.80868 | 4.79196 | -1.672E-2 |
| 62.080 | 4.81533 | 4.79810 | -1.723E-2 |
| 60.080 | 4.82072 | 4.80442 | -1.630E-2 |
| 58.090 | 4.82155 | 4.81086 | -1.069E-2 |
| 56.080 | 4.82744 | 4.81755 | -9.894E-3 |
| 54.080 | 4.83150 | 4.82436 | -7.143E-3 |
| 52.080 | 4.83695 | 4.83133 | -5.617E-3 |
| 50.070 | 4.84389 | 4.83849 | -5.400E-3 |
| 48.040 | 4.84860 | 4.84585 | -2.747E-3 |
| 46.040 | 4.85676 | 4.85322 | -3.536E-3 |
| 44.030 | 4.86268 | 4.86072 | -1.956E-3 |
| 42.020 | 4.86884 | 4.86827 | -5.674E-4 |
| 40.010 | 4.87926 | 4.87583 | -3.427E-3 |
| 38.010 | 4.88262 | 4.88330 | 6.771E-4  |
| 36.010 | 4.88639 | 4.89062 | 4.230E-3  |
| 34.000 | 4.89309 | 4.89774 | 4.647E-3  |
| 32.000 | 4.89767 | 4.90445 | 6.783E-3  |
| 30.000 | 4.89946 | 4.91061 | 1.115E-2  |
| 28.000 | 4.90550 | 4.91601 | 1.051E-2  |
| 25.990 | 4.90892 | 4.92038 | 1.147E-2  |
| 23.990 | 4.91145 | 4.92332 | 1.187E-2  |
| 21.990 | 4.91194 | 4.92437 | 1.243E-2  |
| 20.000 | 4.90770 | 4.92295 | 1.525E-2  |
| 19.000 | 4.90281 | 4.92106 | 1.825E-2  |
| 18.000 | 4.89824 | 4.91823 | 1.999E-2  |
| 17.000 | 4.89636 | 4.91432 | 1.796E-2  |
| 16.000 | 4.89350 | 4.90917 | 1.567E-2  |
| 15.000 | 4.88786 | 4.90260 | 1.474E-2  |
| 14.010 | 4.88393 | 4.89446 | 1.053E-2  |
| 13.010 | 4.87639 | 4.88436 | 7.965E-3  |
| 12.010 | 4.86753 | 4.87207 | 4.538E-3  |
| 10.980 | 4.88057 | 4.85678 | -2.379E-2 |
| 10.030 | 4.87861 | 4.83997 | -3.864E-2 |
| 9.020  | 4.86556 | 4.81885 | -4.671E-2 |
| 8.000  | 4.84769 | 4.79366 | -5.403E-2 |
| 7.000  | 4.82412 | 4.76477 | -5.935E-2 |
| 5.990  | 4.79119 | 4.73097 | -6.023E-2 |
| 5.010  | 4.76768 | 4.69334 | -7.434E-2 |
| 4.000  | 4.72834 | 4.64880 | -7.954E-2 |
| 3.000  | 4.62471 | 4.59589 | -2.882E-2 |
| 2.010  | 4.38404 | 4.51989 | 1.358E-1  |
